# Supplementary material for: Perceptions of Patients With Chronic Obstructive Pulmonary Disease and Their Physiotherapists Regarding the Use of an eHealth Intervention
Source: PubMed Central journal article supplement (PMC5627045; doi:10.2196/humanfactors.7196), 2017-09-19
Supplement: humanfactors_v4i3e20_app2.pdf [file humanfactors_v4i3e20_app2.pdf]

## Multimedia Appendix 2

### Final code list

1. Application (app)
  - a. General
  - b. Tab status
    - i. PA goal
  - c. Tab graph
  - d. Tab messages
  - e. Tab settings
  - f. Experience patient
  - g. Areas of improvement
2. Website/portal
  - a. General
  - b. Overview page
    - i. Messaging
    - ii. Columns on the page
    - iii. “Traffic light colors”
  - c. Patients overview
    - i. Graph
    - ii. Scores
    - iii. Messaging
    - iv. Set and adjust PA goal
    - v. Intensity score
  - d. Areas of improvement
  - e. Use by physiotherapist
3. Experiences smartphone
  - a. Experiences patient
    - i. Usability
    - ii. Easy anxiety
  - b. Experiences physiotherapist
4. Reasons of participation
  - a. Approached or own initiative
  - b. Motive of participation
    - i. Expect benefits
    - ii. Expect disadvantage
5. Provision of information from the researchers
  - a. Before the start of the research
    - i. Inclusion of patients
      1. Inclusion and exclusion criteria
    - ii. Website/portal
    - iii. Application
    - iv. Research progress
  - b. During the research
    - i. Website
    - ii. Application
    - iii. Research progress
      1. Measurement moments
      2. Problems
      3. Support of researchers

6. Time allocation by physiotherapist
  - a. How much time is spent
  - b. Scheduled vs. not scheduled
  - c. Individually or with colleagues
7. Applicability intervention in the future
  - a. Expense to use de intervention
  - b. Motive for using the intervention in the future
8. Practice information
  - a. Personal information physiotherapist
  - b. Team
  - c. Usual care COPD patients
9. General information COPD
10. Research
  - a. Information about patients
  - b. Results measurement moments
  - c. Number of patients
  - d. Support of patients with intervention
