# Supplementary material for: Perceptions of Patients With Chronic Obstructive Pulmonary Disease and Their Physiotherapists Regarding the Use of an eHealth Intervention
Source: PubMed Central journal article supplement (PMC5627045; doi:10.2196/humanfactors.7196), 2017-09-19
Supplement: humanfactors_v4i3e20_app4.pdf [file humanfactors_v4i3e20_app4.pdf]

## Multimedia Appendix 4

### Results patient questionnaire

**Table 1.** Results on use. Scores range from 0-7 with 0: totally disagree and 7: totally agree. Statements are arranged on degree of agreeability.

| question | Statement                                             | Mean $\pm$ standard deviation |
|----------|-------------------------------------------------------|-------------------------------|
| 20       | The application is easy to use                        | 5.95 $\pm$ 1.32               |
| 37       | The application helped me to increase my PA           | 4.92 $\pm$ 2.2                |
| 38       | The application made me feel more fit                 | 4.32 $\pm$ 2.18               |
| 15       | A training on the use of the application is necessary | 3.25 $\pm$ 2.23               |
| 25       | Battery life of the phone was short                   | 3.15 $\pm$ 2.67               |
| 16       | The smartphone suffered from technical failure        | 1.77 $\pm$ 2.37               |
| 17       | The application suffered from technical failure       | 1.37 $\pm$ 1.93               |
| 24       | I did not reach my PA goal because I forgot my phone  | 1 $\pm$ 1.43                  |

**Table 2.** Results on privacy. Scores range from 1-7 with 1: totally disagree and 7: totally agree. Statements are arranged on degree of agreeability.

| Question | Statement                                                                         | Mean $\pm$ standard deviation |
|----------|-----------------------------------------------------------------------------------|-------------------------------|
|          | I do <b>not</b> mind that the following persons have access to my PA information: |                               |
| 40       | • PT                                                                              | 6.48 $\pm$ 0.85               |
| 41       | • Family                                                                          | 5.77 $\pm$ 1.72               |
| 44       | • Family members I selected                                                       | 5.72 $\pm$ 1.88               |
| 45       | • Care insurers                                                                   | 4.33 $\pm$ 2.57               |
| 43       | • A good friend                                                                   | 4.23 $\pm$ 2.34               |
| 46       | • Local authority                                                                 | 3.25 $\pm$ 2.38               |
| 39       | It is good to know the application continuously collects data on my PA            | 5.92 $\pm$ 1.34               |
| 51       | I want to determine which PA information is sent to whom                          | 5.52 $\pm$ 2.03               |
| 48       | I do <b>not</b> mind that my PA information is saved in a medical file            | 5.47 $\pm$ 2                  |
| 47       | I do <b>not</b> mind that my PA information is saved forever                      | 4.48 $\pm$ 2.53               |
| 50       | I worry that I lose my phone and others can access my PA information              | 4.03 $\pm$ 2.22               |
| 49       | Messages in the application should only be visible for me                         | 4 $\pm$ 2.12                  |
| 52       | The application is an invasion on my privacy                                      | 2.65 $\pm$ 2.06               |
| 42       | I worry that this information ends up in the wrong hands                          | 2.73 $\pm$ 2.03               |

**Table 3.** Results on feedback preferences. Scores range from 1-7 with 1: totally disagree and 7: totally agree. For question 62 and 63 scores were 1: never to 7: very frequently. Statements are arranged on degree of agreeability.

| Question | Statement                                                                          | Mean ± standard deviation |
|----------|------------------------------------------------------------------------------------|---------------------------|
| 61       | It was rewarding to see that I reached my PA goal                                  | 6.3 ± 1.31                |
| 55       | I liked the fact that PA was presented in steps                                    | 6.28 ± 1.39               |
| 53       | I liked the fact that I could see my PA information on the smartphone              | 6.23 ± 1.14               |
| 56       | The bar clearly showed my PA goal progress                                         | 6.22 ± 1.39               |
| 60       | The graph provided extra insight into my PA                                        | 5.63 ± 1.74               |
| 65       | The widget on the home screen of the smartphone clearly stated my PA status        | 5.6 ± 1.84                |
| 57       | The emoticon was stimulating                                                       | 5.25 ± 2.16               |
| 59       | The written advice was stimulating                                                 | 5.15 ± 1.81               |
| 58       | It was pleasant to have various choices of emoticons                               | 4.87 ± 1.89               |
| 64       | The messages from the PT supported me in reaching my PA goal                       | 3.34 ± 2.35               |
| 62       | I received messages from the PT in the application                                 | 3.1 ± 2.15                |
| 63       | I sent messages to the PT in the application                                       | 2.05 ± 1.71               |
| 54       | My PA information should not be visible to me, only to my health care professional | 1.68 ± 1.49               |

**Table 4.** Results on personal circumstances. Scores range from 1-7 with 1: never and 7: always. Statements are arranged on frequency of occurrence.

| question | Statement                                                    | Mean ± standard deviation |
|----------|--------------------------------------------------------------|---------------------------|
| 68       | I did not reach my PA goal because of my state of health     | 2.39 ± 1.33               |
| 69       | I was too tired to be able to reach my PA goal               | 2.28 ± 1.49               |
| 70       | I did not reach my PA goal because of personal circumstances | 1.73 ± 1.21               |
| 71       | I was too busy to reach my PA goal                           | 1.68 ± 1.26               |
