# Supplementary material for: Perceptions of Patients With Chronic Obstructive Pulmonary Disease and Their Physiotherapists Regarding the Use of an eHealth Intervention
Source: JMIR Hum Factors. 2017 Sep 19;4(3):e20. doi: 10.2196/humanfactors.7196 (PMC5627045; doi:10.2196/humanfactors.7196)
Supplement: Multimedia Appendix 1 [file humanfactors_v4i3e20_app1.pdf]

# Multimedia Appendices Vorrink et al.

## Multimedia Appendix 1

*Interview questions physiotherapists*

### **Interview Structure – Open interview**

Requirements: voice recorder (borrow from IT helpdesk) and smartphone with application.

### **Phase of consideration**

Starting question:

“You have participated in the eHealth study to increase/retain physical activity of COPD patients after a rehabilitation period, could you tell us how you came to this decision?”

The answer must contain:

Rational factors

- 1) What did you do to try and increase/retain physical activity of COPD patients after a period of pulmonary rehabilitation in the past?
- 2) Beforehand, what were the perceived advantages and disadvantages of the eHealth intervention and which were the most important in deciding to participate in the study?
- 3) Which aspects did you miss in the application and/or website?

Personal factors

- 1) How were you informed about the study and was this information sufficient to use the intervention?
- 2) How much time were you given to use the website?
- 3) Were there aspects you missed in the given information?

Social factors

- 1) Who worked with the website within the physiotherapy practice?
- 2) What did these persons think about the website?
- 3) Do you feel communication between the researchers and these persons was sufficient?

### **Phase of use**

Starting question:

“You have coached/monitored patients with the eHealth intervention after a rehabilitation period, could you indicate how you experienced this coaching/monitoring?”

The answer must contain:

Rational factors

- 1) Did you have the impression that you can positively affect physical activity of COPD patients by using the eHealth intervention?
- 2) Which aspects did you miss when coaching/monitoring your patients with the eHealth intervention and how did you solve this?

Personal factors

- 1) Did you have enough time, knowledge and skills to monitor the patients and intervene with the eHealth intervention?
- 2) What problems were you facing when you used the website?

Social factors

- 1) Who have been involved with the coaching/monitoring of the patients?
- 2) How did these persons rate the eHealth intervention?
- 3) What reactions did you hear about the intervention from your patients?

**Final evaluation**

Start question:

“Would you like to use the eHealth intervention again in the future and why? How can we improve the eHealth intervention?”

- ➔ Look at the pictures and ask for every aspect whether this is good or what can be done better.  
Also use the smartphone to show the application.

Rational factors:

- 1) Could you coach/monitor your patients enough by using the eHealth intervention?
- 2) What have you missed in coaching/monitoring your clients?

## Applicatie

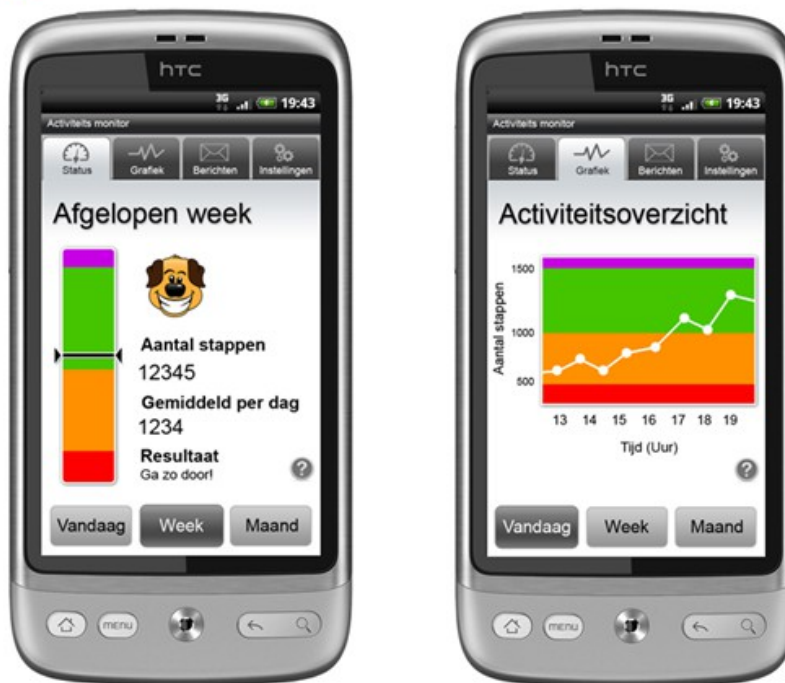

## Website

|      | Naam           | Telefoon ID | Stappen doel | Week score | Maand score | Jaar score | Laatst gesynchroniseerd |                   |                   |
|------|----------------|-------------|--------------|------------|-------------|------------|-------------------------|-------------------|-------------------|
| Kies | Test simulator | 1000        | 5000         | 🔴          | 🔴           | 🔴          | 31-08-2012 15:12        | Download gegevens | Verwijder patient |
| Kies |                | 37          | 7831         | 🔴          | 🟡           | 🔴          | 06-02-2013 05:42        | Download gegevens | Verwijder patient |
| Kies |                | 41          | 6500         | 🔴          | 🔴           | 🟡          | 18-12-2012 01:28        | Download gegevens | Verwijder patient |
| Kies |                | 44          | 6775         | 🟡          | 🟢           | 🟡          | 12-02-2013 02:57        | Download gegevens | Verwijder patient |
| Kies |                | 39          | 8500         | 🟡          | 🟡           | 🟢          | 07-01-2013 00:43        | Download gegevens | Verwijder patient |
| Kies |                | 32          | 6214         | 🔴          | 🟡           | 🟢          | 28-11-2012 00:47        | Download gegevens | Verwijder patient |
| Kies |                | 31          | 9865         | 🔴          | 🟡           | 🟡          | 30-11-2012 01:55        | Download gegevens | Verwijder patient |
| Kies |                | 2453230033  | 1282         | 🟡          | 🟡           | 🟡          | 12-02-2013 06:29        | Download gegevens | Verwijder patient |
| Kies |                | 36          | 2541         | 🔴          | 🟡           | 🟢          | 12-02-2013 05:49        | Download gegevens | Verwijder patient |
| Kies |                |             | 9999         | 🔴          | 🔴           | 🔴          | 30-01-2013 03:39        | Download gegevens | Verwijder patient |
| Kies |                | 42          | 9558         | 🟡          | 🟡           | 🟡          | 11-02-2013 17:08        | Download gegevens | Verwijder patient |
| Kies |                | 34          | 5000         | 🔴          | 🔴           | 🔴          | 18-06-2012 08:42        | Download gegevens | Verwijder patient |
| Kies |                | 40          | 10700        | 🟡          | 🟡           | 🟢          | 07-01-2013 05:27        | Download gegevens | Verwijder patient |
| Kies |                | 43          | 6500         | 🟡          | 🟡           | 🟢          | 07-01-2013 01:35        | Download gegevens | Verwijder patient |
